# Supplementary material
Source: publisher figshare collection journal article supplement (https://geolsoc.figshare.com/ndownloader/files/34444864)
Supplement: Supplementary file 1 [file 34444864]

## Sheet: Appendix 1
Appendix 1: Outline of samples and data from this study
	Sample Lithology	Data Type	Source	Collection Methodology	Number of samples
	Primary Data
	Onshore Solway Basin Lower Annan Sandstone Formation	Hand specimens	Cove Quarry (Location 1)	Hand specimens were extracted using a hammer and chisel at each exposure. At 0.5 m intervals the lithology and vertical facies changes were logged.	34
	Onshore Solway Basin Upper Annan Sandstone Formation	Hand specimens	Glinger Burn (Location 2)		6
	Onshore Solway Basin	Hand specimens	Cliff Bridge (Location 3)		16
	Secondary Data
	Offshore Solway Basin Ormskirk Sandstone Formation	Porosity and permeability	Sourced from OGA via NDR (well 112/15-1 and 112/19-1)	Porosity and permeability data was taken from well reports. Porosity is helium porosity at 1500 psi and permeability is air horizontal permeability.	111
		Petrography	Sourced from OGA via NDR (112/19-1)	Analysis of core plugs and core samples. Core plugs were cut perpendicular to apparent bedding. Thin sections were prepared and point-counted for 300-counts per sample to produce a petrographic analysis.	8
		Geophysical	Sourced from OGA via NDR (well 112/15-1 and 112/19-1)	Geophysical data was sourced from .TIFF log files or raw .LAS files. Mainly gamma (GAPI) and sonic velocity (μs/ft) logs were used for lithological and facies interpretation.
	Offshore EISB SSG (both top St Bees Sandstone Formation and Ormskirk Sandstone Formation)	Petrography, porosity and permeability	Sourced from from former Centrica Energy (North and South Morcombe (wells 110/2a-N1, 110/2a-8, 110/2a-7, 110/2-6, 110/2a-F1 and 110/3a-A3).	Data from the analysis of core plugs and core samples. Porosity measurements were conducted using a Ruska parameter. Permeability is horizontal permeability calculated using dry nitrogen.	443*
			* Grain size from just well 110/2-6.
	Onshore EISB St Bees Sandstone Formation	Thin sections	Sourced from Durham University	Production of blue epoxy-impregnated thin sections from hand specimens, which were point-counted for 300-counts per sample to produce a petrographic analysis.	4

## Sheet: Appendix 2
		Petrographic Point-Counting Data of Ormskirk and top St Bees Sandstones from Well 110/2-6 in the EISB
		Detrital Mineralogy										Blocky Cement (Authigenic)										Clay Cement			Porosity
	Depth	Total Qtz	Total Fspr	Total Mica	Ig Lith	Meta Lith	Sed Lith	Caliche	Det Opaq	Heavy Min	Non-Res Clays	Total Blocky Cem	Non-Fer Cal	Non-Fer Dol	Fer Dol	Gyp/Anh	Qtz	K-Fspr	Pyrite	Haem	Anatase	Total Clay Cem	Ill	Kaol	Total Porosity	Primary	Secondary
	3090	47.5	16.5	0.5	3	3.5	0	1	tr	tr	4.5	13	0.5	9	0	0.5	3.5	tr	tr	0	0	6.5	6	0.5	3.5	3	0.5
	3109.7	37.5	7	0.5	1.5	3	23.5	0	0	0	1	20	0	10.5	2.5	2.5	4.5	0	0	0	0	3.5	3.5	tr	2.5	1.5	1
	3129	51.5	10	0	3.5	4	0.5	0	tr	tr	3	13.5	0	8.5	1.5	0	3.5	0	0	0	tr	10	5.5	4.5	4	3	1
	3142.8	44	10.5	2	4.5	3	0	tr	tr	tr	6	16	0	9.5	2	0	4	0.5	tr	0	0	7	3	4	7	5	2
	3164.8	43	10.5	0.5	6.5	5	0	0	0	0.5	5.5	7	0	0.5	1	0.5	4.5	0.5	0	0	0	8	6.5	1.5	13.5	12	1.5
	3185.4	43.5	10.5	1	5	4.5	0.5	0	tr	0.5	4	14.5	0	4	3	tr	7	0	0	0	0.5	7.5	6	1.5	8.5	5	3.5
	3208.4	64	5.5	0	2	4.5	0.5	0	tr	tr	4	11	0	1	2	tr	7.5	0.5	0	0	0	5	1.5	3.5	3.5	2.5	1
	3230.2	52.5	3	tr	5.5	7	1	0	tr	tr	7	13	0	2.5	2.5	tr	8	0	0	tr	tr	7.5	3.5	4	3.5	3	0.5
	3252.8	56	1.5	1.5	2	5	5.5	0	tr	tr	4	13	0	1.5	0.5	tr	11	0	0	0	tr	8.5	6	2.5	3	1.5	1.5
	3276	58	tr	tr	3	5	0	0	0	tr	2	11.5	0	3	1	0	7	0	0	0	0.5	10	4	6	10.5	8	2.5
	3287.9	34.5	1	0.5	0.5	tr	0.5	tr	0.5	1	30	15	0	13	1.5	0	0	0	0	0	0.5	15.5	15	0.5	1	0	1
	3307.7	59.5	1.5	tr	3	2.5	0	0	tr	tr	0.5	27.5	0	20.5	1	0.5	5.5	0	0	0	tr	3	1.5	1.5	2.5	2	0.5
	3330.1	59	1	tr	2.5	2	0	0	tr	tr	9	5	0	2.5	tr	tr	2.5	0	0	0	tr	10	6.5	3.5	11.5	9.5	2
	3359.8	67	1.5	0	3.5	2.5	0	0	tr	tr	3	14.5	0	2	0.5	3.5	8	0.5	0	0	0	1.5	1.5	tr	6.5	6	0.5
	3380.5	50	1.5	2	8.5	4.5	4.5	0	tr	0.5	2	11.5	0	5	0.5	tr	5.5	0	0	0.5	tr	10	8	2	5	3.5	1.5
	3401.1	58	2.5	2	7	4	1.5	0	tr	tr	1	12	0	4	1	0	6.5	0	0	tr	0.5	10	8.5	1.5	2	0.5	1.5
	3422.3	55	2	tr	6.5	1	0.5	0	0	tr	3.5	12.5	0	2.5	3	0	7	0	0	tr	tr	13	11	2	6	3	3
	3454.9	59	0.5	0	5.5	2.5	5.5	0	tr	tr	0.5	14.5	0	3.5	tr	0	11	0	0	0	0	4.5	4.5	0	7.5	6	1.5
	3476.1	49	4	tr	5.5	5.5	1	0	tr	0.5	1.5	13	0	8.5	0.5	0	4	0	0	tr	tr	9.5	9.5	0	10.5	9.5	1
	3497.1	73	2.5	tr	0	1.5	0	0	0	tr	2.5	10.5	0	4.5	0.5	0	5.5	0	0	0	0	5	4.5	0.5	5	3.5	1.5
	3521.4	55.5	8.5	1	2.5	3.5	tr	0	tr	tr	1.5	5	0	0.5	1	tr	3	0	0	0	0.5	6	5.5	0.5	16.5	13	3.5
	3543.8	56.5	8	1.5	5.5	2	0	0	0	tr	3	8	0	3	1	0	4	0	0	0	tr	8	6	2	7.5	2.5	5
	3566.1	60	5.5	0.5	2.5	3	0	0	tr	tr	1.5	6.5	0	4	1	0	1.5	0	0	tr	tr	8	7	1	12.5	9	3.5
	3588.3	74.5	tr	0.5	2	5	0	0	0	tr	1	4.5	0	2	0.5	0	2	0	0	tr	tr	6	5.5	0.5	6.5	4.5	2
	3612.4	55	6	0.5	6.5	tr	0	tr	tr	tr	1	11.5	0	10	0.5	tr	1	0	0	0	tr	5.5	5.5	tr	14	10	4
	3635.6	60	4.5	1	4	1.5	0	0	0	0.5	2	7	0	1.5	0.5	0	5	0	0	tr	tr	9.5	8	1.5	10	8.5	1.5
	3656.2	60.5	9	1	7.5	2.5	1	0	tr	tr	tr	11	0	0.5	0	0	10.5	tr	0	0	0	5	4.5	0.5	2.5	1	1.5
	3684.4	58	7.5	tr	3	5	0	tr	0	tr	1.5	2	0	1	tr	0	1	tr	0	tr	0	7.5	7.5	tr	15.5	12	3.5
	3704.8	57	6.5	0.5	5	4	0.5	0.5	0	tr	2	7.5	0	0.5	0.5	tr	6.5	tr	0	0	0	5	5	tr	11.5	7.5	4
	3721.9	55	8.5	0	5.5	3	tr	0	0	tr	1	11.5	0	0.5	tr	0	11	tr	0	0	0	3	2.5	0.5	12.5	8.5	4
	3754.2	44.5	14	0.5	5.5	6.5	tr	tr	tr	tr	2	3	0	tr	0	0	3	tr	0	0	tr	5.5	4.5	1	18.5	12	6.5
	3775.6	50	11.5	1.5	2.5	1	0	0	tr	tr	3	13.5	0	12	tr	0	1.5	tr	0	0	tr	7.5	7	0.5	9.5	6.5	3
	3796.1	58.5	10.5	0.5	4.5	5	0	0	tr	tr	2	1.5	0	tr	tr	0	1.5	0	0	0	0	6	6	0	11.5	8.5	3
	3829	60.5	10.5	1	1.5	4	0	0	tr	tr	1.5	6.5	0	2	0.5	0	4	0	0	tr	tr	5.5	5	0.5	9	7	2
	3862.2	52	10	tr	5.5	4	0	0	tr	tr	3.5	7	0	3	0.5	0	3	0	0.5	tr	tr	5.5	5.5	tr	12.5	11	1.5
	3894.4	56	5	tr	5	7	0	0	0	tr	2	14	0	1.5	tr	0	10.5	0	tr	2	0	5	5	0	6	3.5	2.5
	3913.9	60	6	0	4	8.5	0	0	0	0	0.5	12.5	0	2	tr	0	9.5	0	tr	1	tr	3	3	0	5.5	4	1.5

## Sheet: Appendix 3
Appendix 3: Petrographic Point-Counting Data of Ormskirk Sandstone from Well 112/19-1 in the Solway Basin
	Sample	H1	H2	H3	H4	H5	H6	H7	H8
	Depth (m)	915	917.25	918.75	918.75	919.5	919.75	920	920.55
	Facies Code	A2	A5	A1	A1	A1	A2	A4	A5
	Facies Description	Dry Sandflat	Wet Sandflat	Aeolian Dune	Aeolian Dune	Aeolian Dune	Dry Sandflat	Damp Sandflat	Wet Sandflat
	Quartz	55.5	44.5	55.5	58	57.5	48	54.5	49.5
	mono	48.5	39	44.5	43	48	41.5	49	46
	poly	7	5.5	11	15	9.5	6.5	5.5	4.5
	Feldspar	2	0.5	0.5	0.5	5	0.5	0.5	0.5
	Alkalii	0.5	0	0.5	0	5	0	0.5	0
	Plagioclase	1.5	0.5	0	0.5	Trace	0.5	0	0.5
	Mica	0	Trace	0	0	0	1	0.5	0.5
	Muscovite	0	Trace	0	0	0	1	0.5	0.5
	Biotite	0	0	0	0	0	0	0	0
	Chlorite	0	0	0	0	0	0	0	0
	Rock Fragments	6.5	7.5	2.5	7.5	2	6.5	4	6.5
	Intermediate	0	0	0.5	0	0	0	0	0
	Igneous	3.5	2.5	1	2	0	5	0	2.5
	Metamorphic	1	1	1	1.5	0	0.5	1.5	1.5
	Sedimentary	2	4	0	4	2	1	0.5	2.5
	Heavy minerals	Trace	1.5	0	0.5	0.5	Trace	0.5	0.5
	Optically non-resolvable clays	11	7	4.5	7.5	5.5	27	7.5	19.5
	Illite/Smectite	Trace	12.5	2.5	0	5	0.5	4	0
	Kaolinite	0	0	0	0	0	0	0	0
	Chlorite	0	0	0	0	0	0	0	0
	Total Carbonate	10.5	5	3	1	5.5	0	19	11.5
	non-ferroan calcite	0	0	0	0	0	0	0	0
	ferroan calcite	0.5	0	0	0	0	0	0	0
	non-ferroan dolomite	0	0	0	0	0	0	0	0
	ferroan dolomite	10	5	2.5	1	5.5	0	19	11.5
	Siderite	0	0	0.5	0	0	0	0	0
							0
	Barytes	0	0.5	0	0	0	0	0	0
	Anhydrite	0	0.5	19.5	6.5	5	0	2	0
	Gypsum	0	0	0	0.5	0	0	0	0
	Autthigenic Silica	6	8	4.5	4	5	1.5	4	2.5
	Authigenic Feldspar	0	0	0	0	0	0	0	0
	Anatase	0	Trace	0	0	0	0	0	0
	Opaques	0.5	Trace	0.5	Trace	Trace	1.5	Trace	Trace
	pyrite	0.5	Trace	0	0	0	1.5	0	0
	haematite	Trace	0	0.5	Trace	Trace	Trace	Trace	Trace
	Porosity	8	8.5	7	7	13.5	12.5	3.5	8
	Primary intergranular	5	3	6.5	6.5	11	3.5	3	3.5
	Secondary grain dissolution	3	5.5	0.5	0.5	2.5	9	0.5	4.5
	Microporsity	Trace	Trace	Trace	Trace	Trace	Trace	Trace	Trace
	Residual hydrocarbons	0	4	0	0	0	1	0.5	1
	Helium Porosity (%)	13.1	11.1	11.7	18.7	15.3	17.8	10.4	11.8
	Horizontal Permeability (mD)	120	0.68	335	1804	555	62.4	2.05	1.46

## Sheet: Appendix 4
Appendix 4: Isotopic analysis results for both ASF and KSF (onshore) primary samples
	ASF Calcite Cement		KSF Ferroan Dolomite Cement
	n-23		n-17
	δ18O (PDB)	δ13C (PDB)	δ18O (PDB)	δ13C (PDB)
	-6.2	0.3	-3	-3.3
	-4.4	0.3	-5.2	-0.8
	-4.6	-0.2	-5	-1.2
	-5.9	-0.5	-4.8	-1.6
	-7.6	-0.7	-5.8	-1.7
	-6.7	-1	-6.8	-1.8
	-6.8	-0.9	-5.2	-3
	-4	-1	-7.1	-3.2
	-8.1	-1.1	-8.5	-3.8
	-3.4	-1.6	-8.2	-4.1
	-5.6	-1.3	-9.5	-3.8
	-5.8	-1.4	-6.8	-5.3
	-8.6	-1.5	-9.5	-5.5
	-7.3	-1.6	-10.2	-5.5
	-6	-1.7	-10.8	-5.6
	-8.8	-3	-7.2	-6.1
	-7.2	-3.11	-7	-6.9
	-10	-3.4
	-9.2	-4.3
	-8.7	-4.9
	-6.9	-5.2
	-7.3	-5.4
	-9.2	-5.4

## Sheet: Appendix 5
Appendix 5: Fluid inclusion microthermometric data for ASF and KSF (onshore) primary samples
	ASF (n-10)
	Homogenization temperatures of fluid inclusions in quartz overgrowths (QTZ-OG) (only).
	Sample		Homogenisation Temperature Th (°C)	Salinity Wt % NaCl
	1	QTZ-OG	96	10.25
	2	QTZ-OG	103.3	16.71
	3	QTZ-OG	124.4	18.01
	4	QTZ-OG	101.6	12.77
	5	QTZ-OG	95.1	11.05
	6	QTZ-OG	118.3	13.43
	7	QTZ-OG	112	11.26
	8	QTZ-OG	125.1	17.93
	9	QTZ-OG	121.7	17.66
	10	QTZ-OG	108.2	14.27
	KSF (n-4)
	Homogenization temperatures of fluid inclusions in quartz overgrowth & dolomite cement
	1	QTZ-OG	97	17.6
	2	QTZ-OG	108
	3	QTZ-OG	120.2	14.6
	4	QTZ-OG	114.7	12.51
	1	Dolomite Cement	101.2	20.78
	2	Dolomite Cement	134.9	24.55
	3	Dolomite Cement	127.2	24.9
	4	Dolomite Cement	106.5	22.11
	*No hydrocarbon inclusions were observed under UV light microscopy
	*Th data were obtained from isolated inclusions, located away from visible cleavage planes for the dolomite

## Sheet: Appendix 6
Appendix 6: Permeability and porosity data for Solway Basin well 112/15-1 & 112/19-1
	Well 112/15-1
	Depth (m)	Horizontal Permeability (air at 1500 psi)	Porosity (Helium at 1500 psi)	Facies
	923.5	65.19	10.6	Playa Lake
	926.55	0.64	5.8	Playa Lake
	929.59	308.56	18	Aeolian
	932.64	0.02	2.4	Fluvial
	935.69	0.11	7.7	Fluvial
	941.79	0.04	7.8	Fluvial
	951.3	833.64	20.1	Fluvial
	951.6	158.15	16.6	Alluvial Plain
	951.87	368	15.3	Alluvial Plain
	952.15	97	11.6	Alluvial Plain
	952.45	7.15	12.7	Alluvial Plain
	952.82	6.93	14.4	Fluvial
	953.37	47.98	16.1	Fluvial
	953.73	957.99	19.1	Aeolian
	953.98	7.47	14.4	Aeolian
	954.07	2206.93	23.9	Aeolian
	954.37	1354.88	21.7	Aeolian
	954.43	1.48	4.4	Aeolian
	954.65	1239.4	22.2	Aeolian
	954.89	461.46	19.2	Aeolian
	955.2	1159.04	20.3	Aeolian
	955.56	1259.1	22.6	Aeolian
	955.87	1449.03	22.3	Aeolian
	956.11	231.41	9.8	Fluvial
	956.48	302.88	16.5	Fluvial
	956.78	379.31	20.7	Fluvial
	957.03	533.65	21	Fluvial
	957.03	701.28	21.6	Aeolian
	957.7	1741.75		Aeolian
	957.97	0.01	1.8	Aeolian
	958.31	7781.69		Aeolian
	958.85	0.01	5.2	Playa Lake
	959.1	0.55	8.6	Playa Lake
	959.46	1.01	11.2	Playa Lake
	959.77	0.09	12.9	Playa Lake
	959.98	2.97	13.2	Playa Lake
	960.35	0.05	7.1	Playa Lake
	960.65	11.99	11.6	Playa Lake
	960.87	0.02	4.7	Playa Lake
	961.2	0.04	6.5	Playa Lake
	961.29	0.48	7.9	Playa Lake
	961.6	3.76	13	Alluvial Plain
	961.6	0.42	11.6	Fluvial
	961.96	12.06	14.1	Alluvial Plain
	962.21	108.2	18.2	Alluvial Plain
	962.51	329.42	15.6	Fluvial
	963.06	236.36	19.7	Fluvial
	963.43	7.77	7.3	Fluvial
	963.79	234.27	11.3	Alluvial Plain
	964.04	0.26	10.9	Alluvial Plain
	964.34	0.27	9.1	Alluvial Plain
	964.95	447.33	19.6	Fluvial
	965.25	4.99	14.7	Fluvial
	965.59	0.36	7.4	Fluvial
	965.86	90	11.7	Fluvial
	966.17	152.71	12.9	Fluvial
	967.14	2.43	10.8	Alluvial Plain
	967.69	9.27	14.3	Fluvial
	967.85	20.45	11.8	Fluvial
	968.36	16.91	11.8	Alluvial Plain
	968.58	247.82	16	Alluvial Plain
	968.94	576.56	19.5	Alluvial Plain
	969.52	24.5	11.6	Alluvial Plain
	969.89	573.15	14.9	Alluvial Plain
	970.44	639.61		Alluvial Plain
	970.74	203.54	17.8	Alluvial Plain
	970.74	3.77	10.5	Alluvial Plain
	971.32	1605.26	20.7	Aeolian
	971.65	30.75	13.1	Aeolian
	971.9	2066.62	23.9	Aeolian
	972.42	340.02	16.7	Alluvial Plain
	972.57	72.64	14.5	Alluvial Plain
	973.18	242.88	19	Alluvial Plain
	996.65	552.14	21	Aeolian
	1036.27	87.4	17.5	Aeolian
	1066.75	18.38	15.9	Fluvial
	1078.94	93.57	20.2	Aeolian
	1088.08	12.71	19.6	Fluvial
	Well 112/19-1
	915	120	13.1	Dry Sandflat
	915.25	207	20.1	Wet Sandflat
	915.5	16.1	14	Wet Sandflat
	916	222	16.1	Damp Sandflat
	916.5	1676	24.3	Aeolian Dune
	916.75	1578	21.6	Aeolian Dune
	917	50.9	18	Wet Sandflat
	19.725	0.68	11.1	Wet Sandflat
	918	1278	25.3	Aeolian Dune
	918.25	1276	24.6	Aeolian Dune
	918.5	335	11.7	Aeolian Dune
	918.75	1804	18.7	Aeolian Dune
	919	910	16.8	Aeolian Dune
	919.5	555	15.3	Aeolian Dune
	919.75	62.4	17.8	Dry Sandflat
	920	2.05	10.4	Damp Sandflat
	920.25	0.74	10.1	Wet Sandflat
	920.5	1.46	11.8	Wet Sandflat
	920.75	209	19.4	Wet Sandflat
	921.25	37.3	16.2	Damp Sandflat
	921.5	2067	19.8	Dry Sandflat
	921.75	362	21	Wet Sandflat
	922.25	501	18.7	Dry Sandflat
	922.5	83.1	14.8	Wet Sandflat
	922.75	44.5	17.8	Wet Sandflat
